# Supplementary material for: Lability classification of soil organic matter in the northern permafrost region
Source: Copernicus journal article supplement (doi:10.5194/bg-2019-89), 2019-05-21

1 **Lablity classification of soil organic matter in the northern permafrost region**

2  
3 *Kuhry et al., Supplement*

4  
5  
6  
7 **Captions for Tables and Figures in Supplemental Materials**

8  
9 Table S1. Overview of field study areas and incubated samples

10  
11 Figure S1. Cross correlations between geochemical parameters for all samples in the four incubation  
12 experiments: a-c, PAGE21; d-f, CryoCarb 1-Kolyma; g-i, CryoCarb 2-Taymyr; j-l, CryoCarb  
13 3-Seida. All regressions significant ( $p < 0.05$ ).

14  
15 Figure S2. Correlations between geochemical parameters and  $\mu\text{gC-CO}_2$  production per gram dry  
16 weight (gdw) for all samples in the four incubation experiments: a-c, PAGE21; d-f, CryoCarb  
17 1-Kolyma; g-i, CryoCarb 2-Taymyr; j-l, CryoCarb 3-Seida. All regressions significant  
18 ( $p < 0.05$ ).

19  
20 Figure S3.  $\mu\text{gC-CO}_2$  production per gram dry weight as a function of %C of the sample for the  
21 different landscape unit classes in the CryoCarb 2-Taymyr (a, top panel) and CryoCarb 3-Seida  
22 (b, lower panel) incubation experiments: Alluvial class (red line and diamonds, CryoCarb 2-  
23 Taymyr experiment only); Mineral class (brown line and squares); Peaty wetland class (light  
24 green line and circles); Peatland class (dark green line and circles). All regressions significant,  
25  $p < 0.05$ , except for peat deposits in the CryoCarb 2-Taymyr dataset (n.s.).

26  
27 Figure S4.  $\mu\text{gC-CO}_2$  production per gram dry weight as a function of C/N of the sample for the  
28 different landscape unit classes in the PAGE21 (a, top panel left), CryoCarb 1-Kolyma (b,  
29 lower panel left), CryoCarb 2-Taymyr (c, top panel right) and CryoCarb 3-Seida (d, lower  
30 panel right) incubation experiments: Alluvial class (red line and diamonds); Eolian class (blue  
31 line and triangles); Mineral class (brown line and squares); Peaty wetland class (dark green line  
32 and circles); Peatland class (light green line and circles). All regressions significant,  $p < 0.05$ ,  
33 except for peaty wetland and peat deposits in the PAGE21 dataset and peat deposits in the  
34 CryoCarb 1-Kolyma and CryoCarb 3-Seida datasets (n.s.). Note that not all landscape unit  
35 classes are represented in all four incubation experiments.

36  
37 Figure S5. a)  $\mu\text{gC-CO}_2$  production per gram carbon as a function of %C of the sample and b)  $\mu\text{gC-}$   
38  $\text{CO}_2$  production per  $\text{cm}^3$  as a function of %C of the sample, for the different landscape classes  
39 in the PAGE21 dataset: Alluvial class (red line and diamonds); Eolian class (blue line and  
40 triangles); Mineral class (brown line and squares); Peaty wetland class (dark green line and  
41 circles); Peatland class (light green line and circles). Non-significant regressions,  $p > 0.05$ , are  
42 marked n.s.

43  
44 Figure S6. C content (as %C of dry weight) in samples of (a) the PAGE21 and (b) the CryoCarb 1-  
45 Kolyma incubation experiments, grouped according to soil horizon criteria. Abbreviations: AL-  
46 OL = Active layer topsoil organics; AL-Min = Active layer mineral; AL-Ce = Active layer C-  
47 enriched; P-Min = Permafrost layer mineral; P-Ce = Permafrost layer C-enriched; AL-Pty =

48 Active layer thin peat (CryoCarb 1-Kolyma experiment only); AL-Pt = Active layer peat; P-Pt =  
49 Permafrost layer peat (CryoCarb 1-Kolyma experiment only); AL-Lss OL = Active layer topsoil  
50 organics in Late Holocene loess deposits (PAGE21 experiment only); AL-Lss Min = Active  
51 layer mineral in Late Holocene loess deposits (PAGE21 experiment only); P-Lss Min =  
52 Permafrost layer mineral in Late Holocene loess deposits (PAGE21 experiment only); P-Yed =  
53 Permafrost Pleistocene Yedoma deposits (CryoCarb 1-Kolyma experiment only); Th-Yed =  
54 Thawed out Pleistocene Yedoma deposits (CryoCarb 1-Kolyma experiment only). Box-whisker  
55 plots show mean and standard deviation (in red) and median, first and third quartiles and  
56 min/max values (in black), for the different soil horizon groups.

57

58

59

60 Table in Supplement

61

62 Page 3

63

64

65

66 Figures in Supplement

67

68 Pages 4-11

69

70

71

Table S1

| Study area     | Geographic location         | Approximate coordinates | Permafrost zone | Vegetation zone                   | Mean Annual/July Temperatures | Nr profiles / incubated soil samples | Partner and incubation experiment | Time of soil sampling |
|----------------|-----------------------------|-------------------------|-----------------|-----------------------------------|-------------------------------|--------------------------------------|-----------------------------------|-----------------------|
| Ny Ålesund     | Svalbard                    | 78.9 N, 11.7 E          | Continuous      | Tundra                            | -5.8/+5.2                     | 16 / 24                              | UCOP_PAGE21                       | Summer 2013           |
| Adventdalen    | Svalbard                    | 78.2 N, 15.9 E          | Continuous      | Tundra                            | -6.0/+6.2                     | 35 / 79                              | UCOP_PAGE21                       | Summer 2013           |
| Lena Delta     | N Siberia                   | 72.3 N, 126.3 E         | Continuous      | Tundra                            | -12.5/+10.1                   | 43 / 122                             | UCOP_PAGE21                       | Summer 2013           |
| Logata         | Taymir Peninsula, N Siberia | 73.4 N, 98.4 E          | Continuous      | Tundra                            | -14.3/+11.2                   | 33 / 218                             | USB_CryoCarb 2                    | Summer 2011           |
| Shalaurovo     | Lower Kolyma, NE Siberia    | 69.5 N, 161.7 E         | Continuous      | Tundra                            | -12.1/+11.7                   | 22 / 279                             | USB_CryoCarb 1                    | Summer 2010           |
| Arymas         | Taymir Peninsula, N Siberia | 72.5 N, 101.7 E         | Continuous      | Tundra, Forest Islands            | -13.3/+12.2                   | 34 / 284                             | USB_CryoCarb 2                    | Summer 2011           |
| Cherskiy       | Lower Kolyma, NE Siberia    | 68.8 N, 161.6 E         | Continuous      | Forest (-Tundra), Lowland, Alpine | -11.1/+12.7                   | 16 / 174                             | USB_CryoCarb 1                    | Summer 2010           |
| Seida          | NW Russia                   | 67.1 N, 62.9 E          | Discontinuous   | Tundra, Forest Islands            | -6.1/+13.0                    | 8 / 80                               | USB_CryoCarb 3                    | Summer 2008           |
| Stordalen Mire | Abisko, N Sweden            | 68.3 N, 19.1 E          | Sporadic        | Alpine treeline ecotone           | -0.2/+11.6                    | 5 / 13                               | UCOP_PAGE21                       | Summer 2013           |

Figure S1.

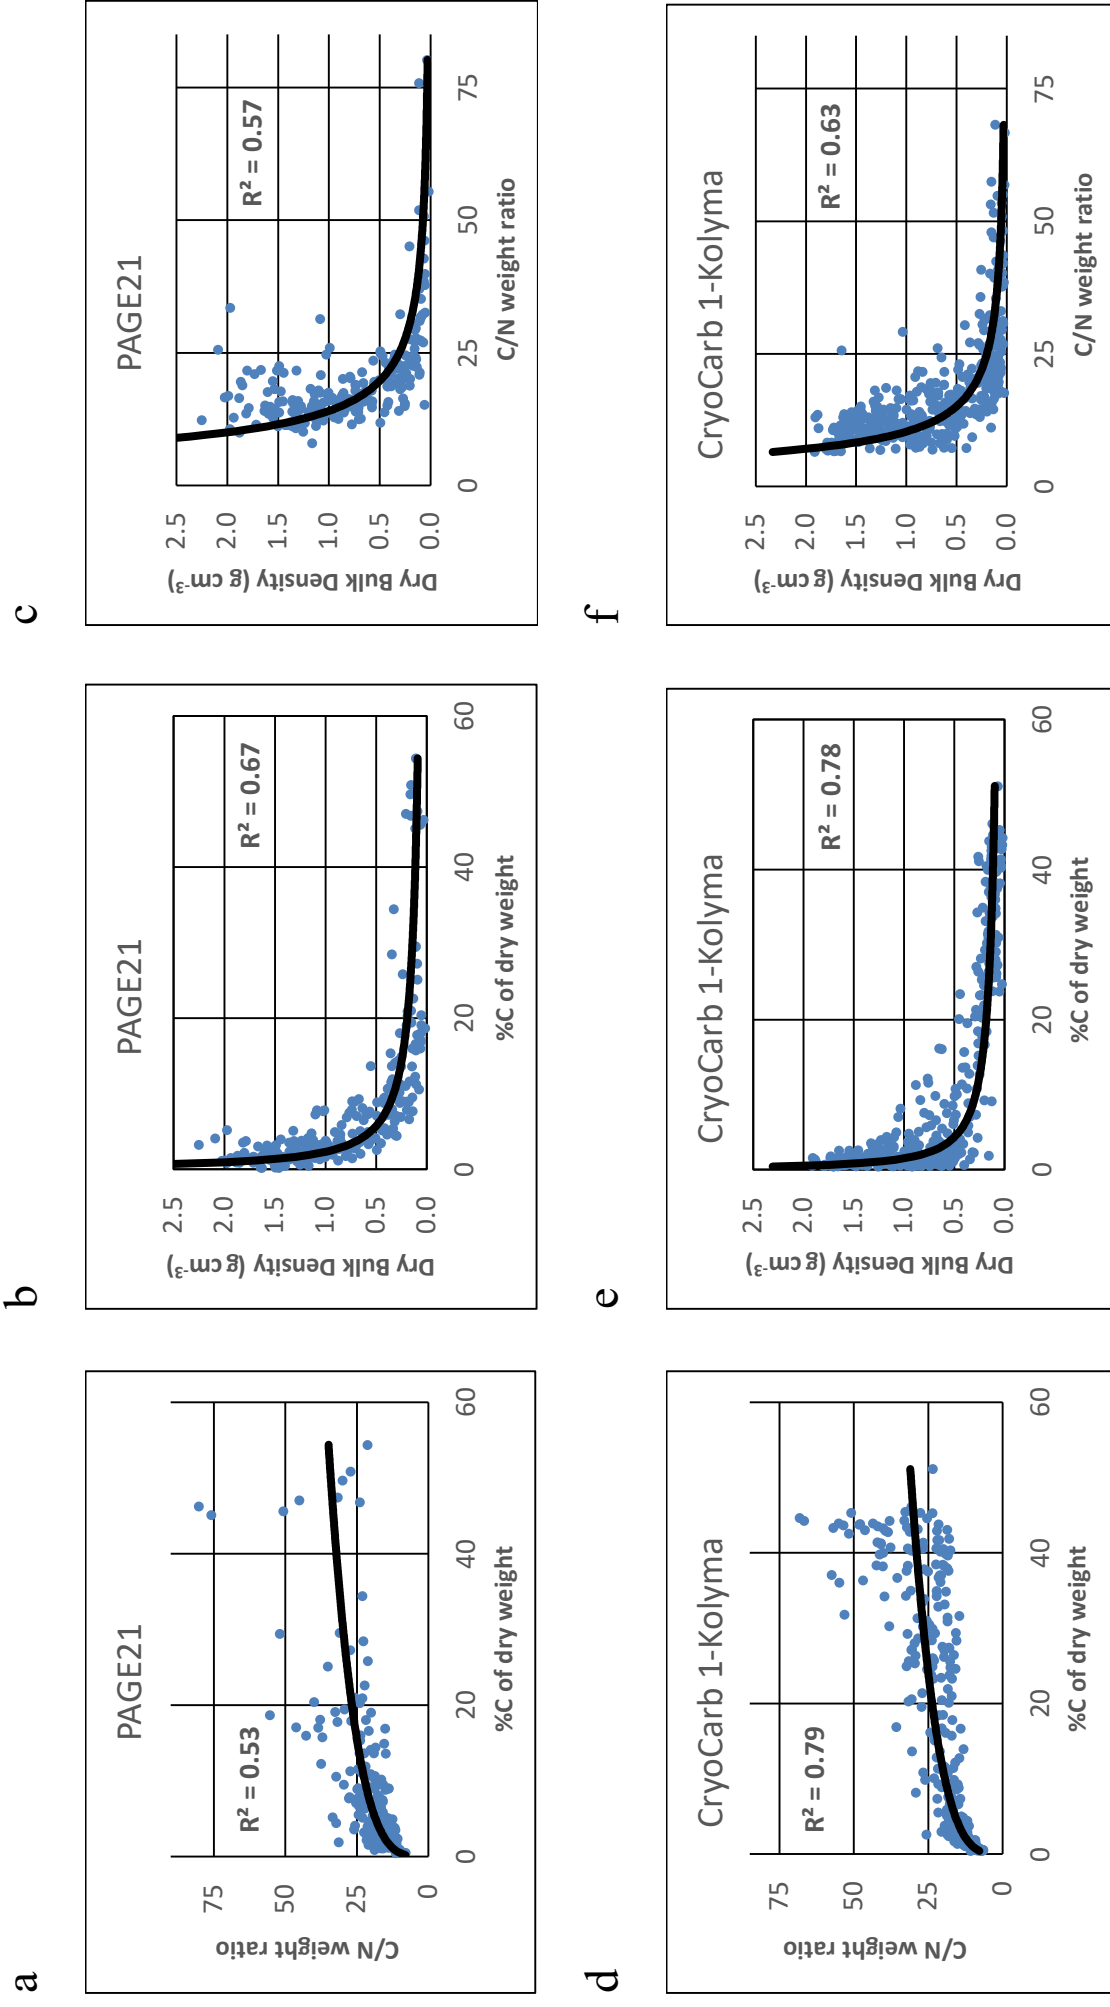

Figure S1, cont'd.

g

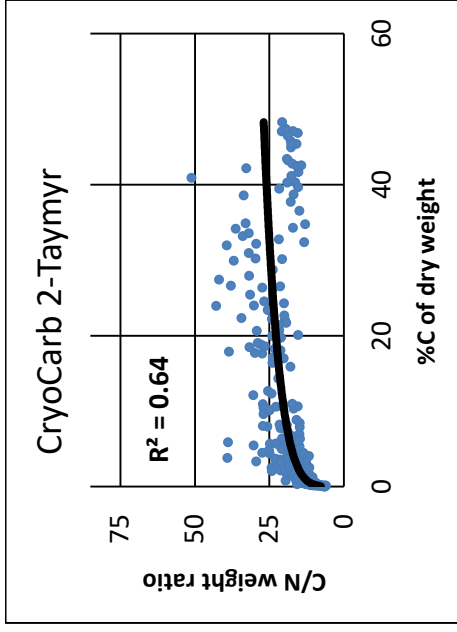

h

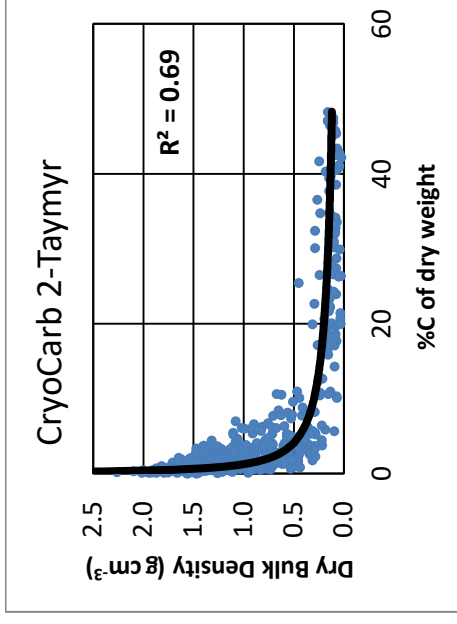

i

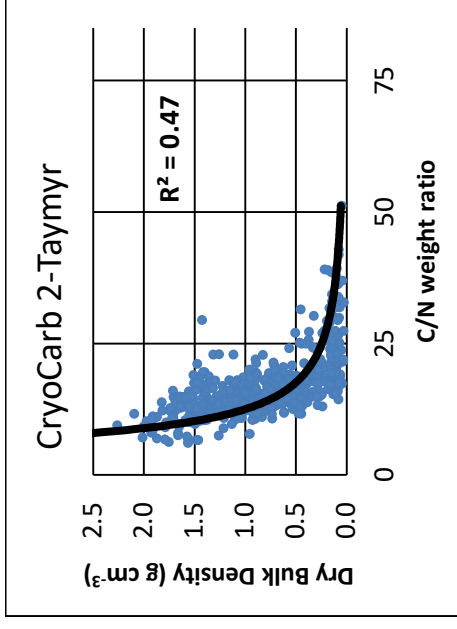

j

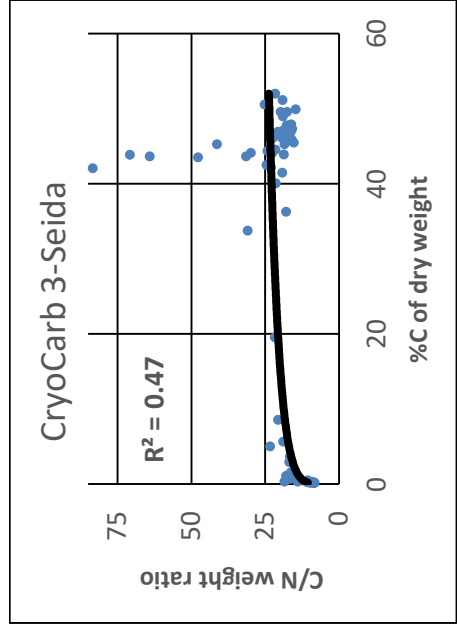

k

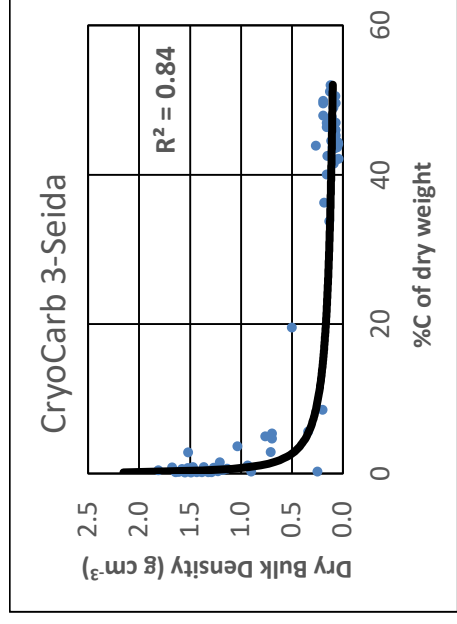

l

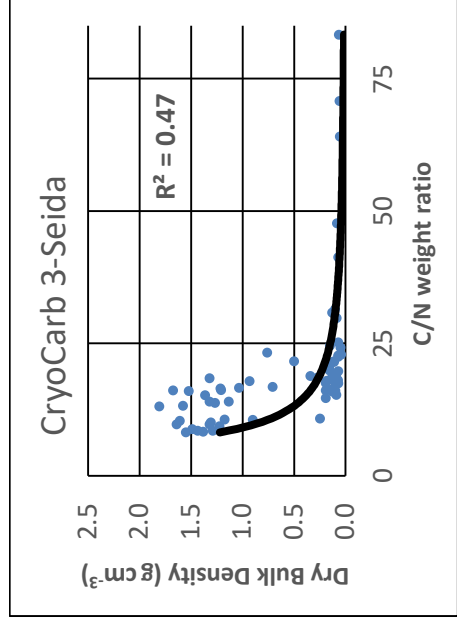

Figure S2.

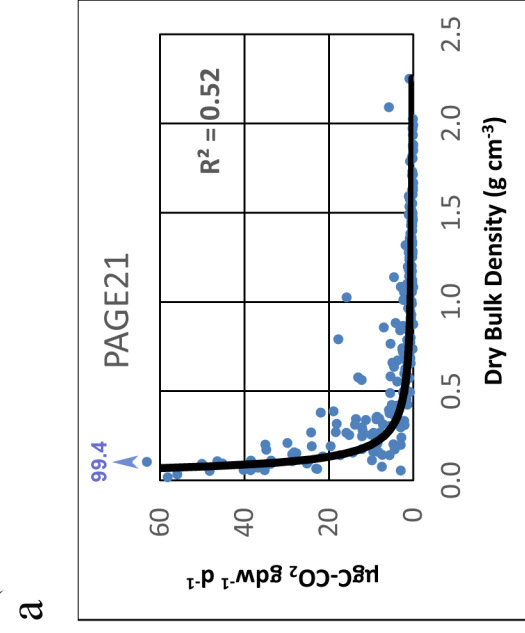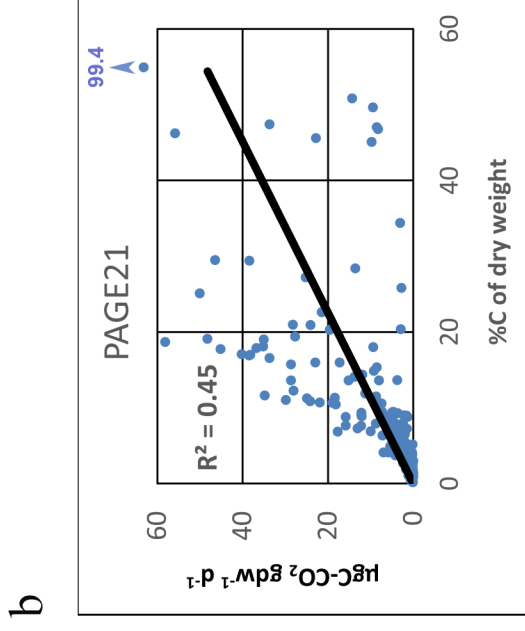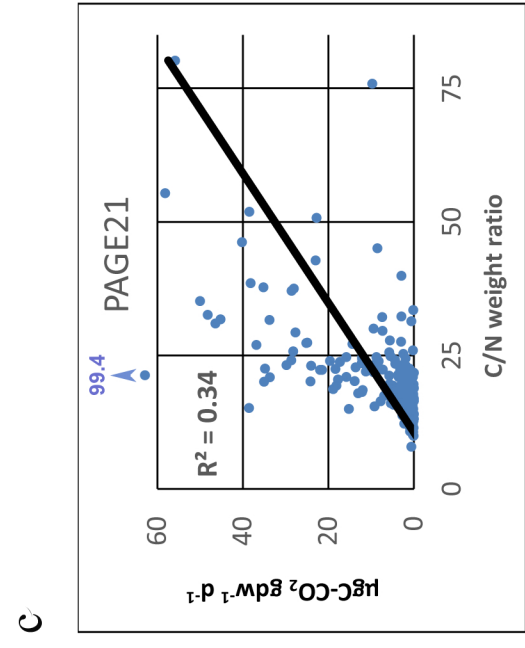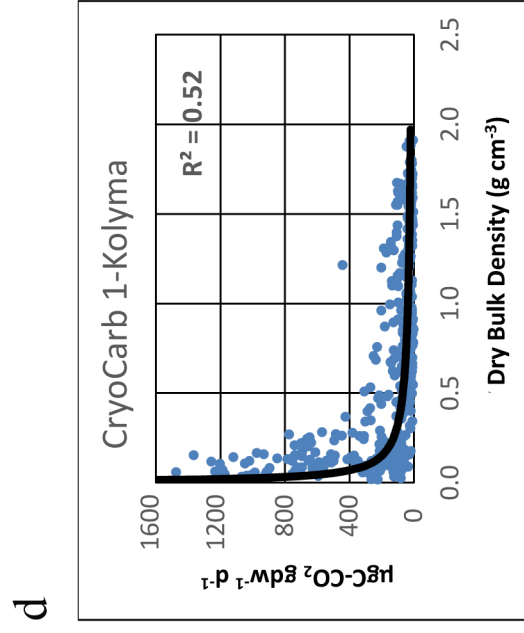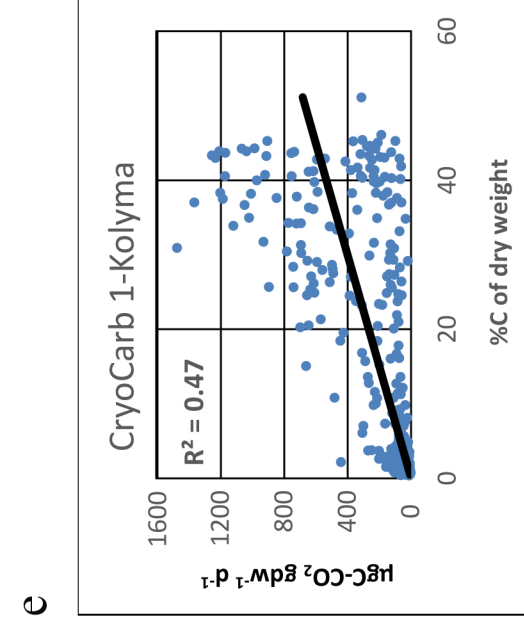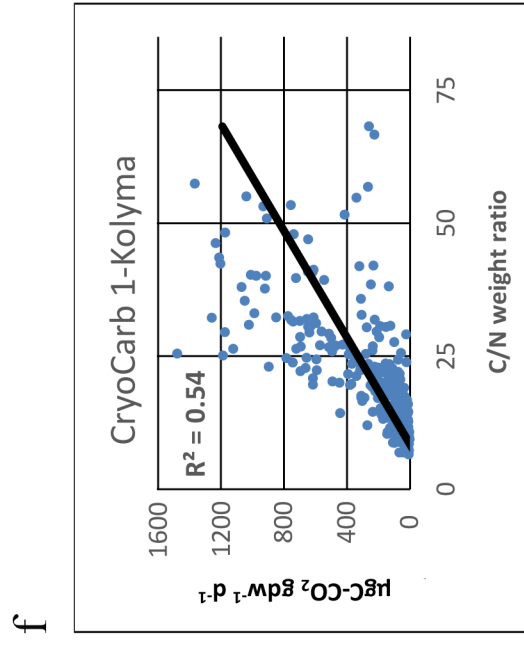

Figure S2, cont'd.

g

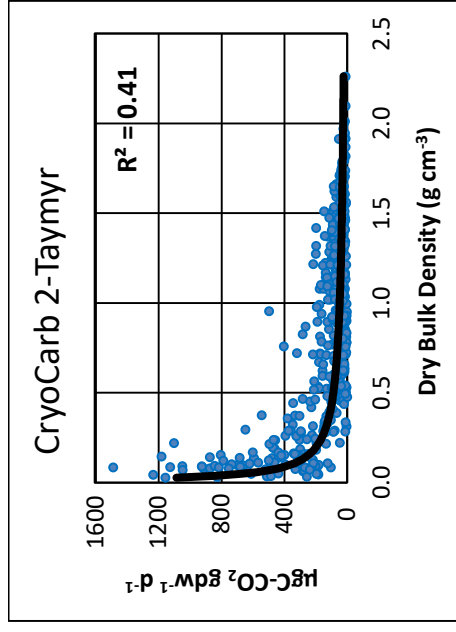

h

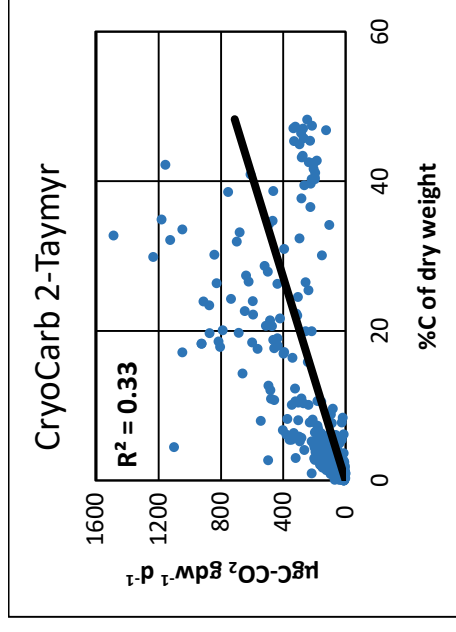

i

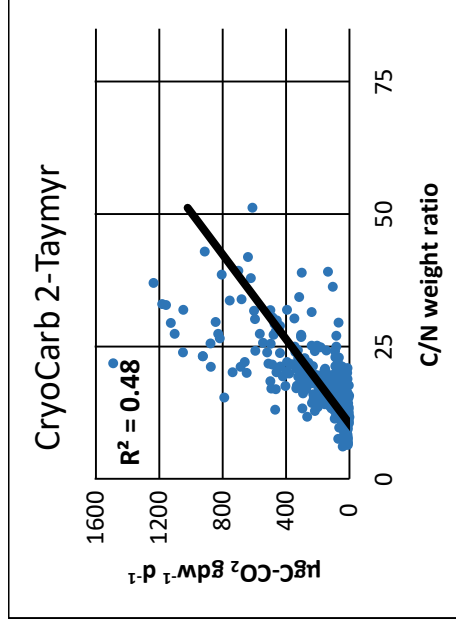

j

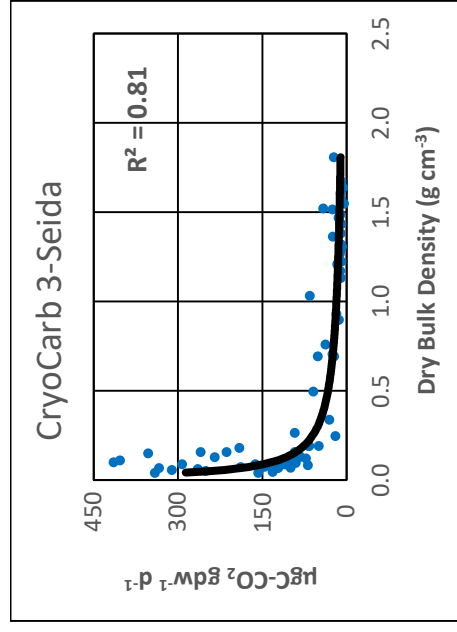

k

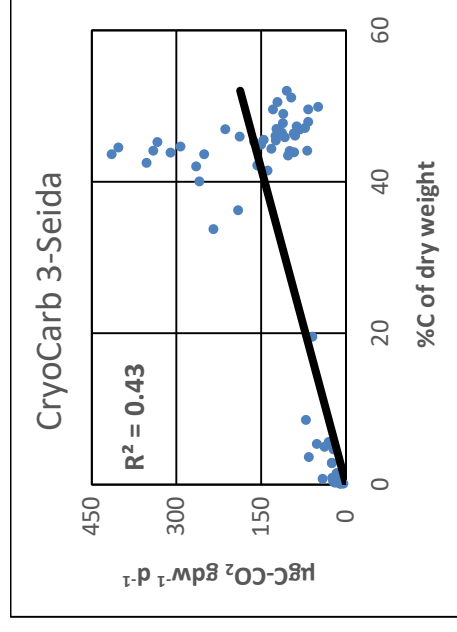

l

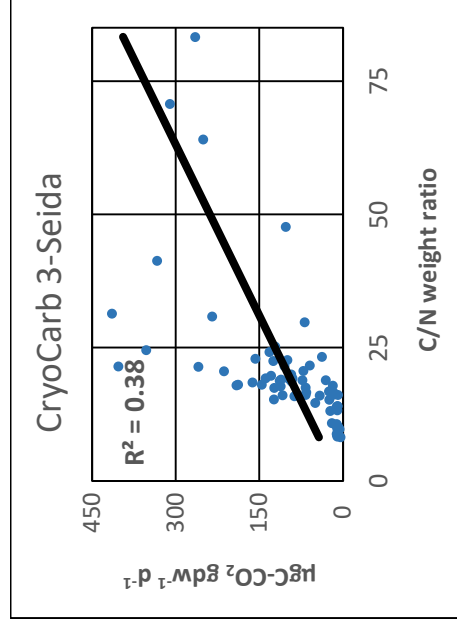

Figure S3

a

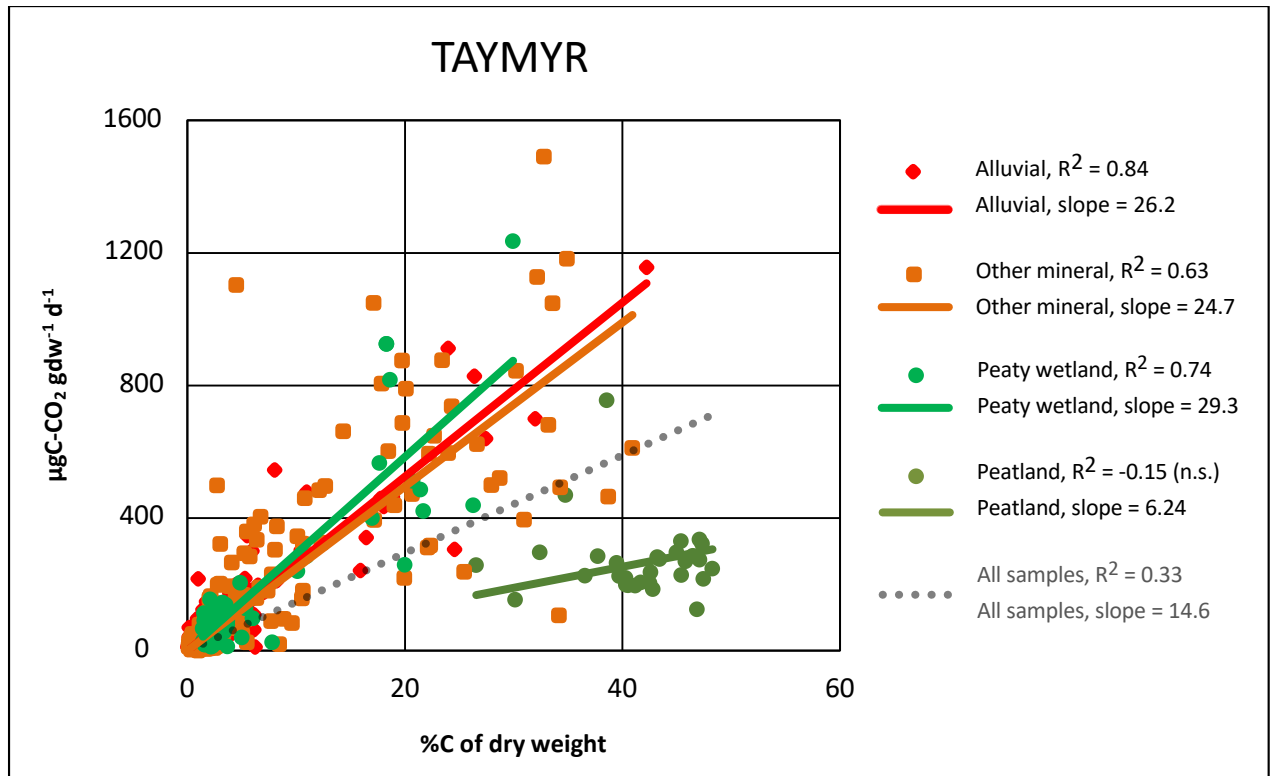

b

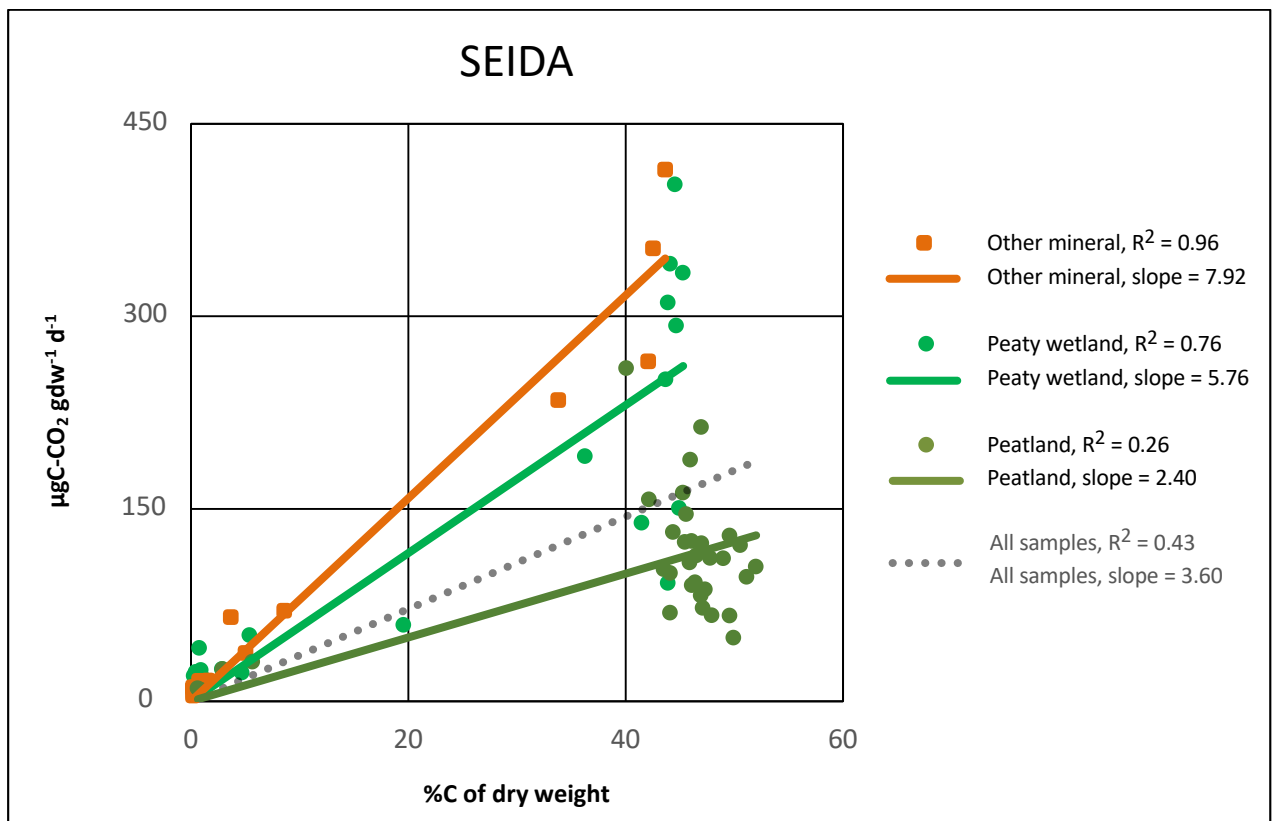



Figure S4.  
a. PAGE21

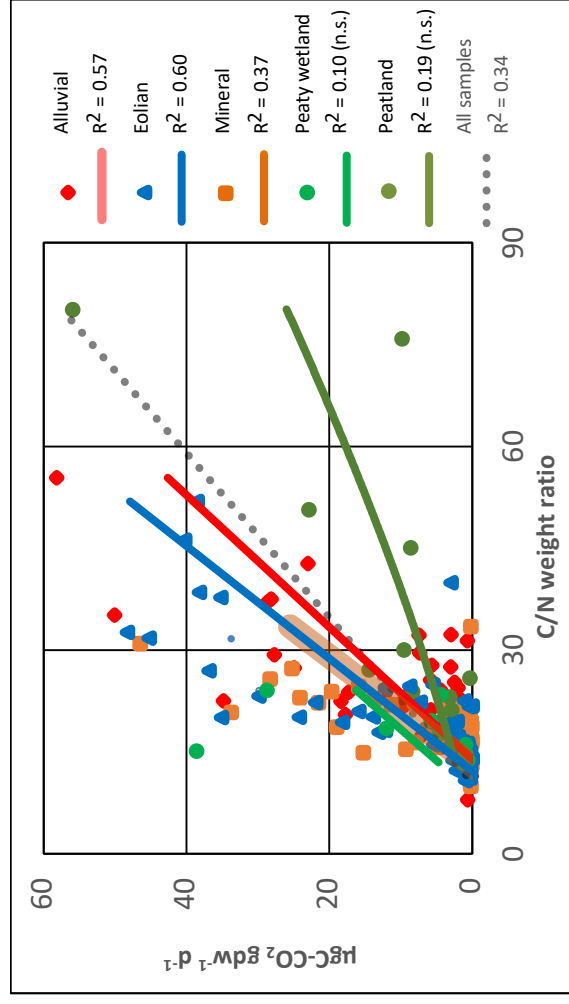

b. CryoCarb 1-Kolyma

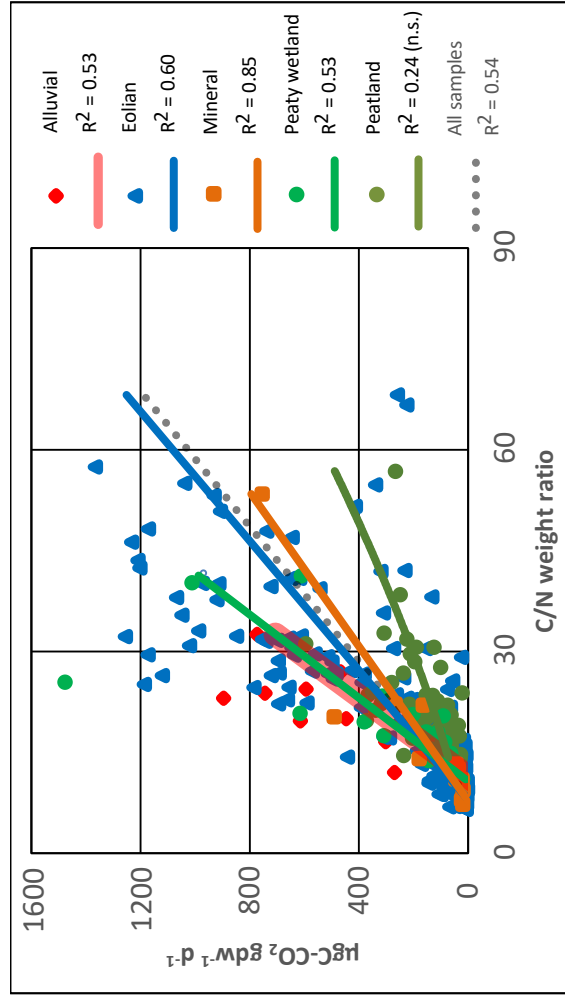

c. CryoCarb 2-Taymyr

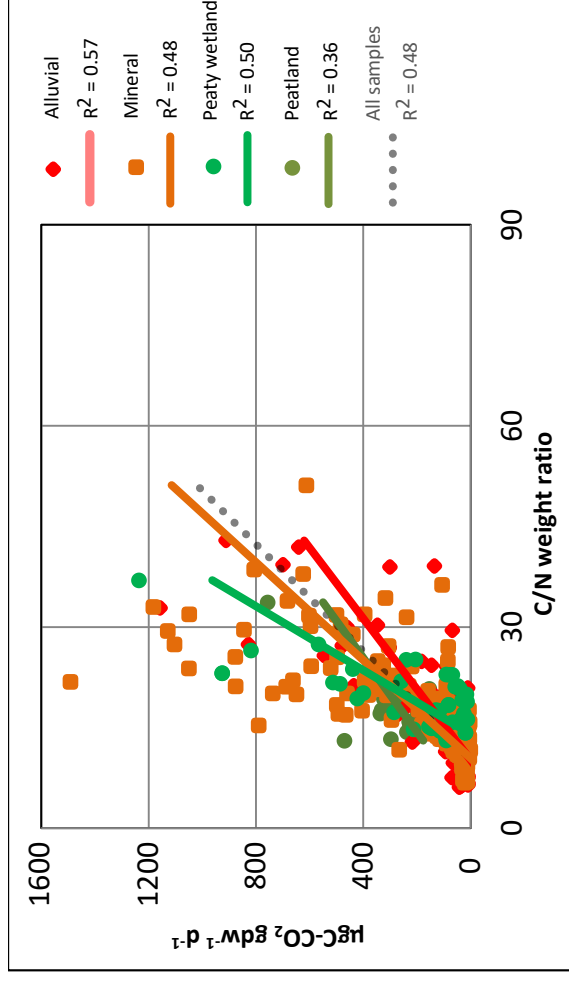

d. CryoCarb 3-Seida

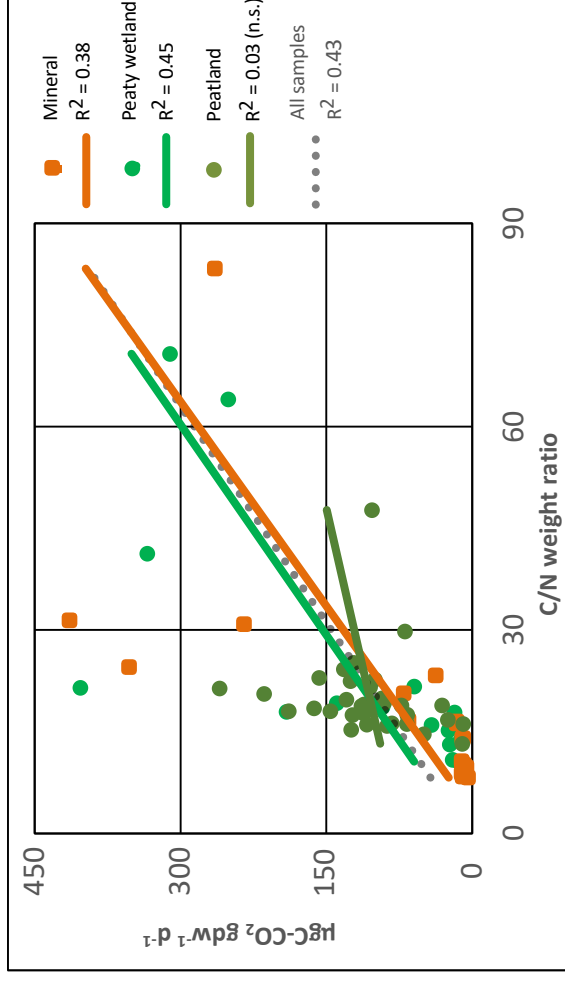

Figure S5.

a

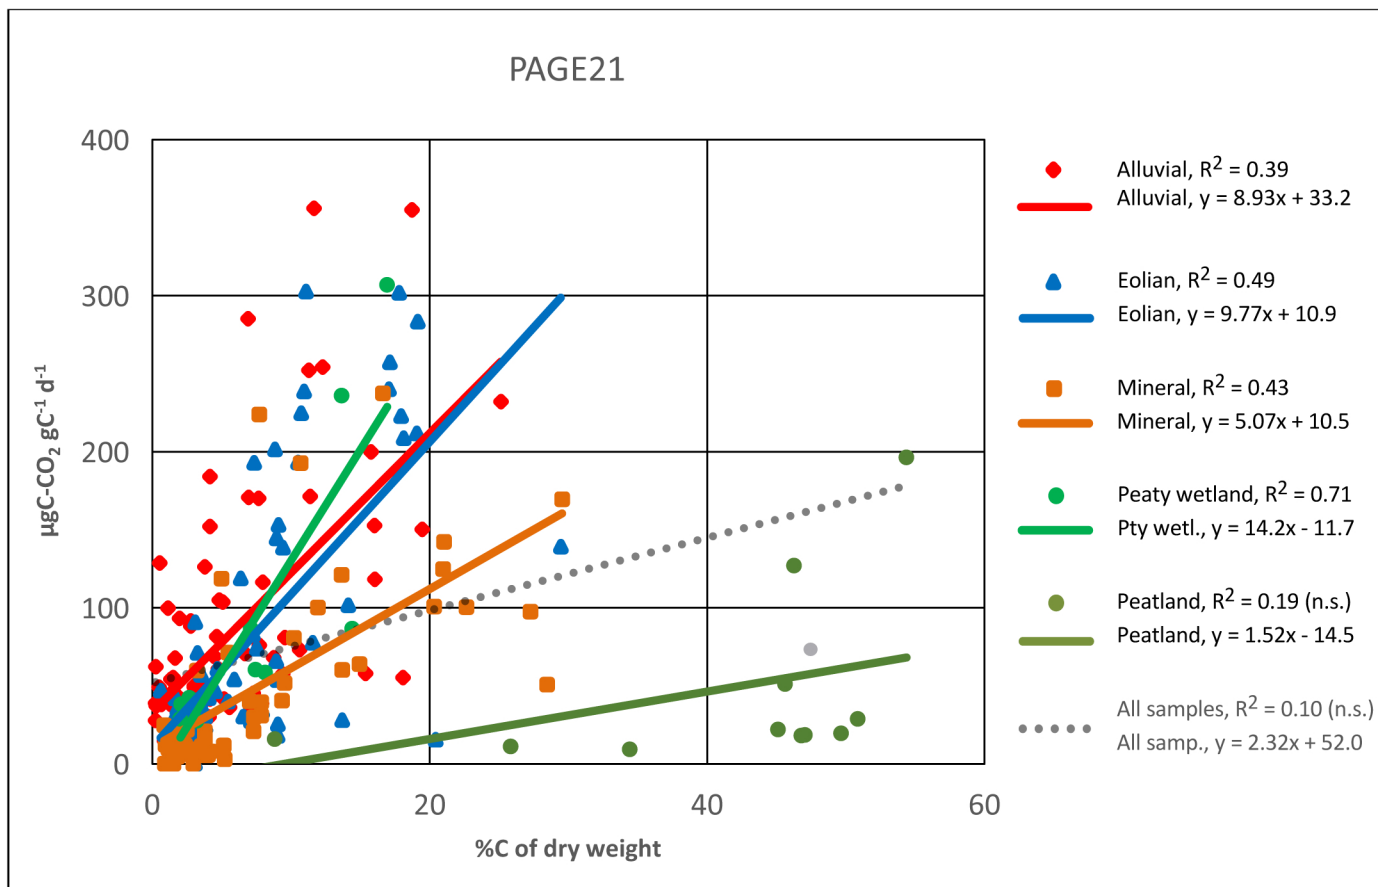

b

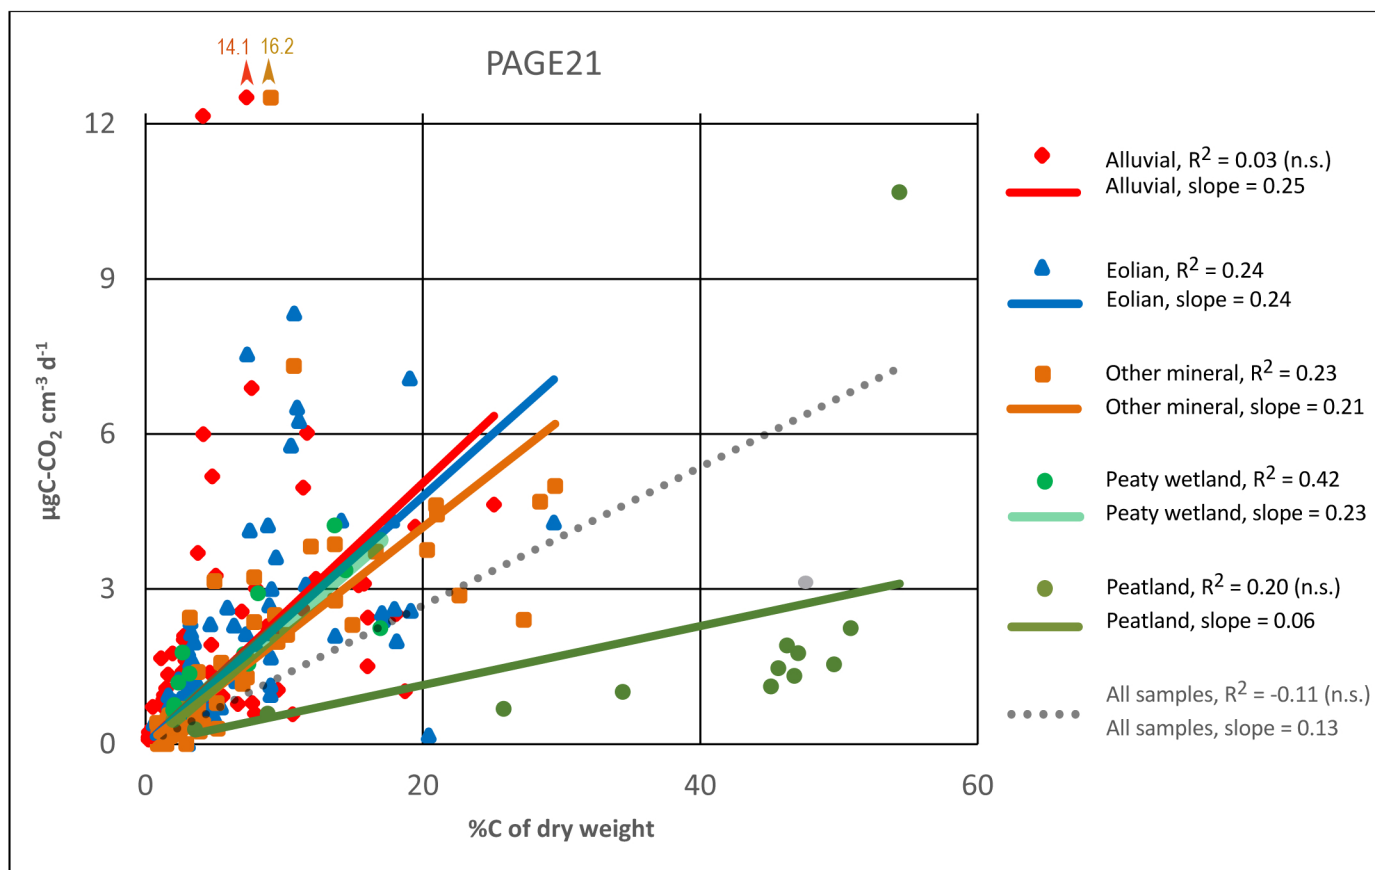

Figure S6.

a

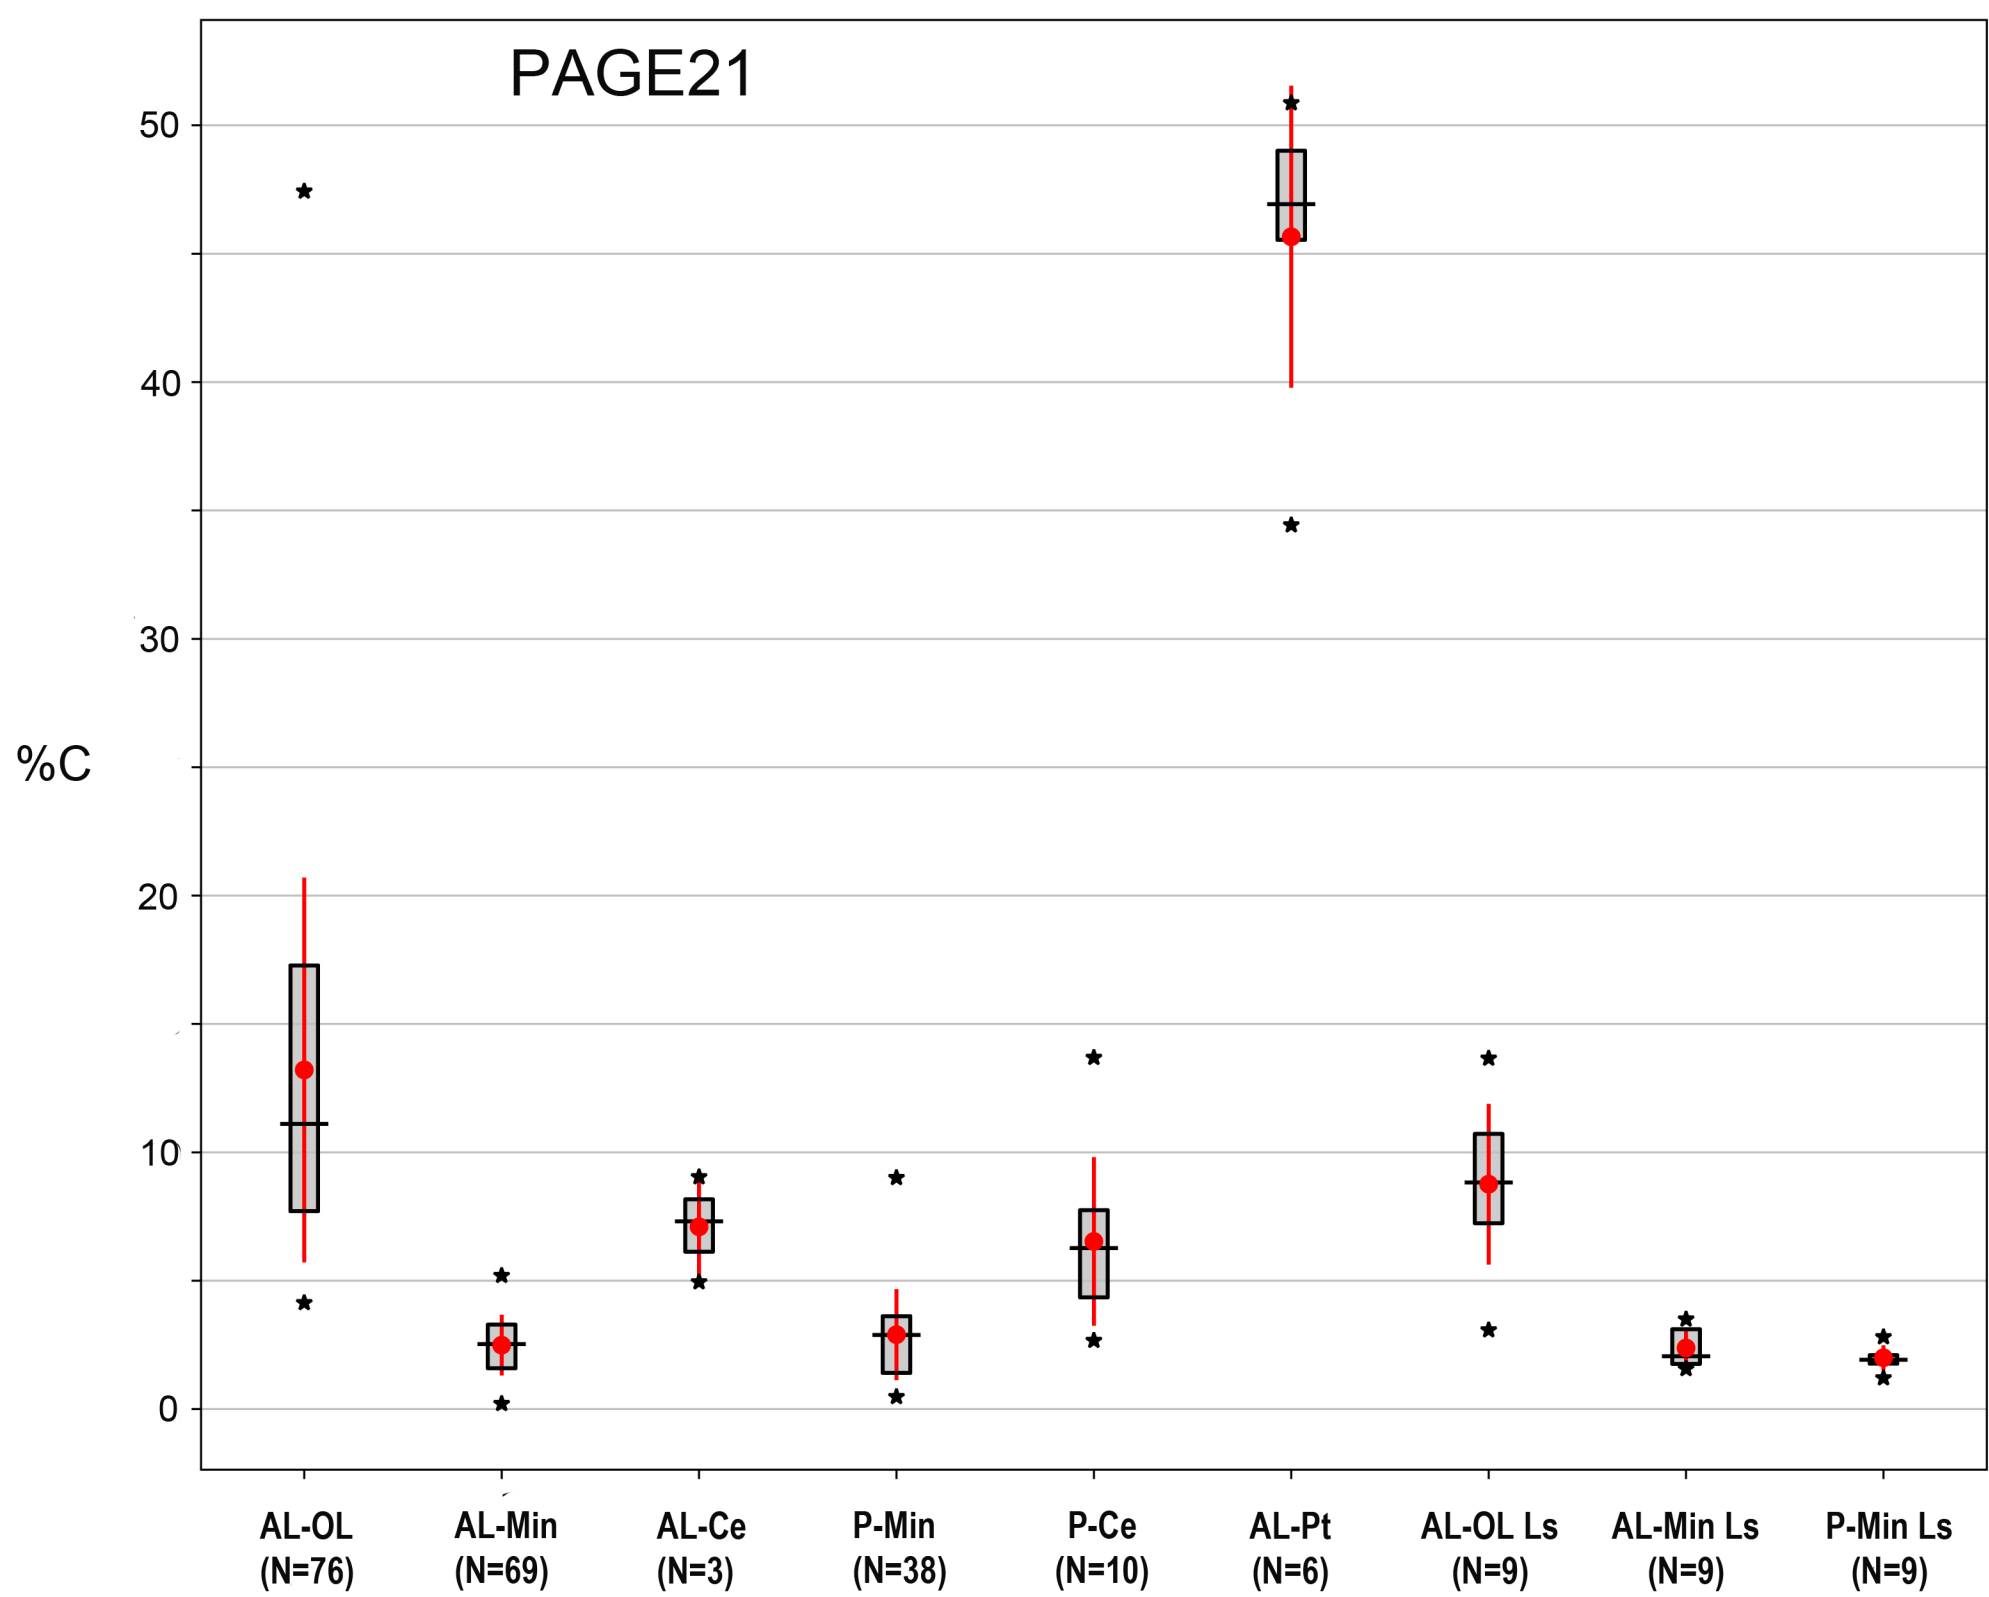

b

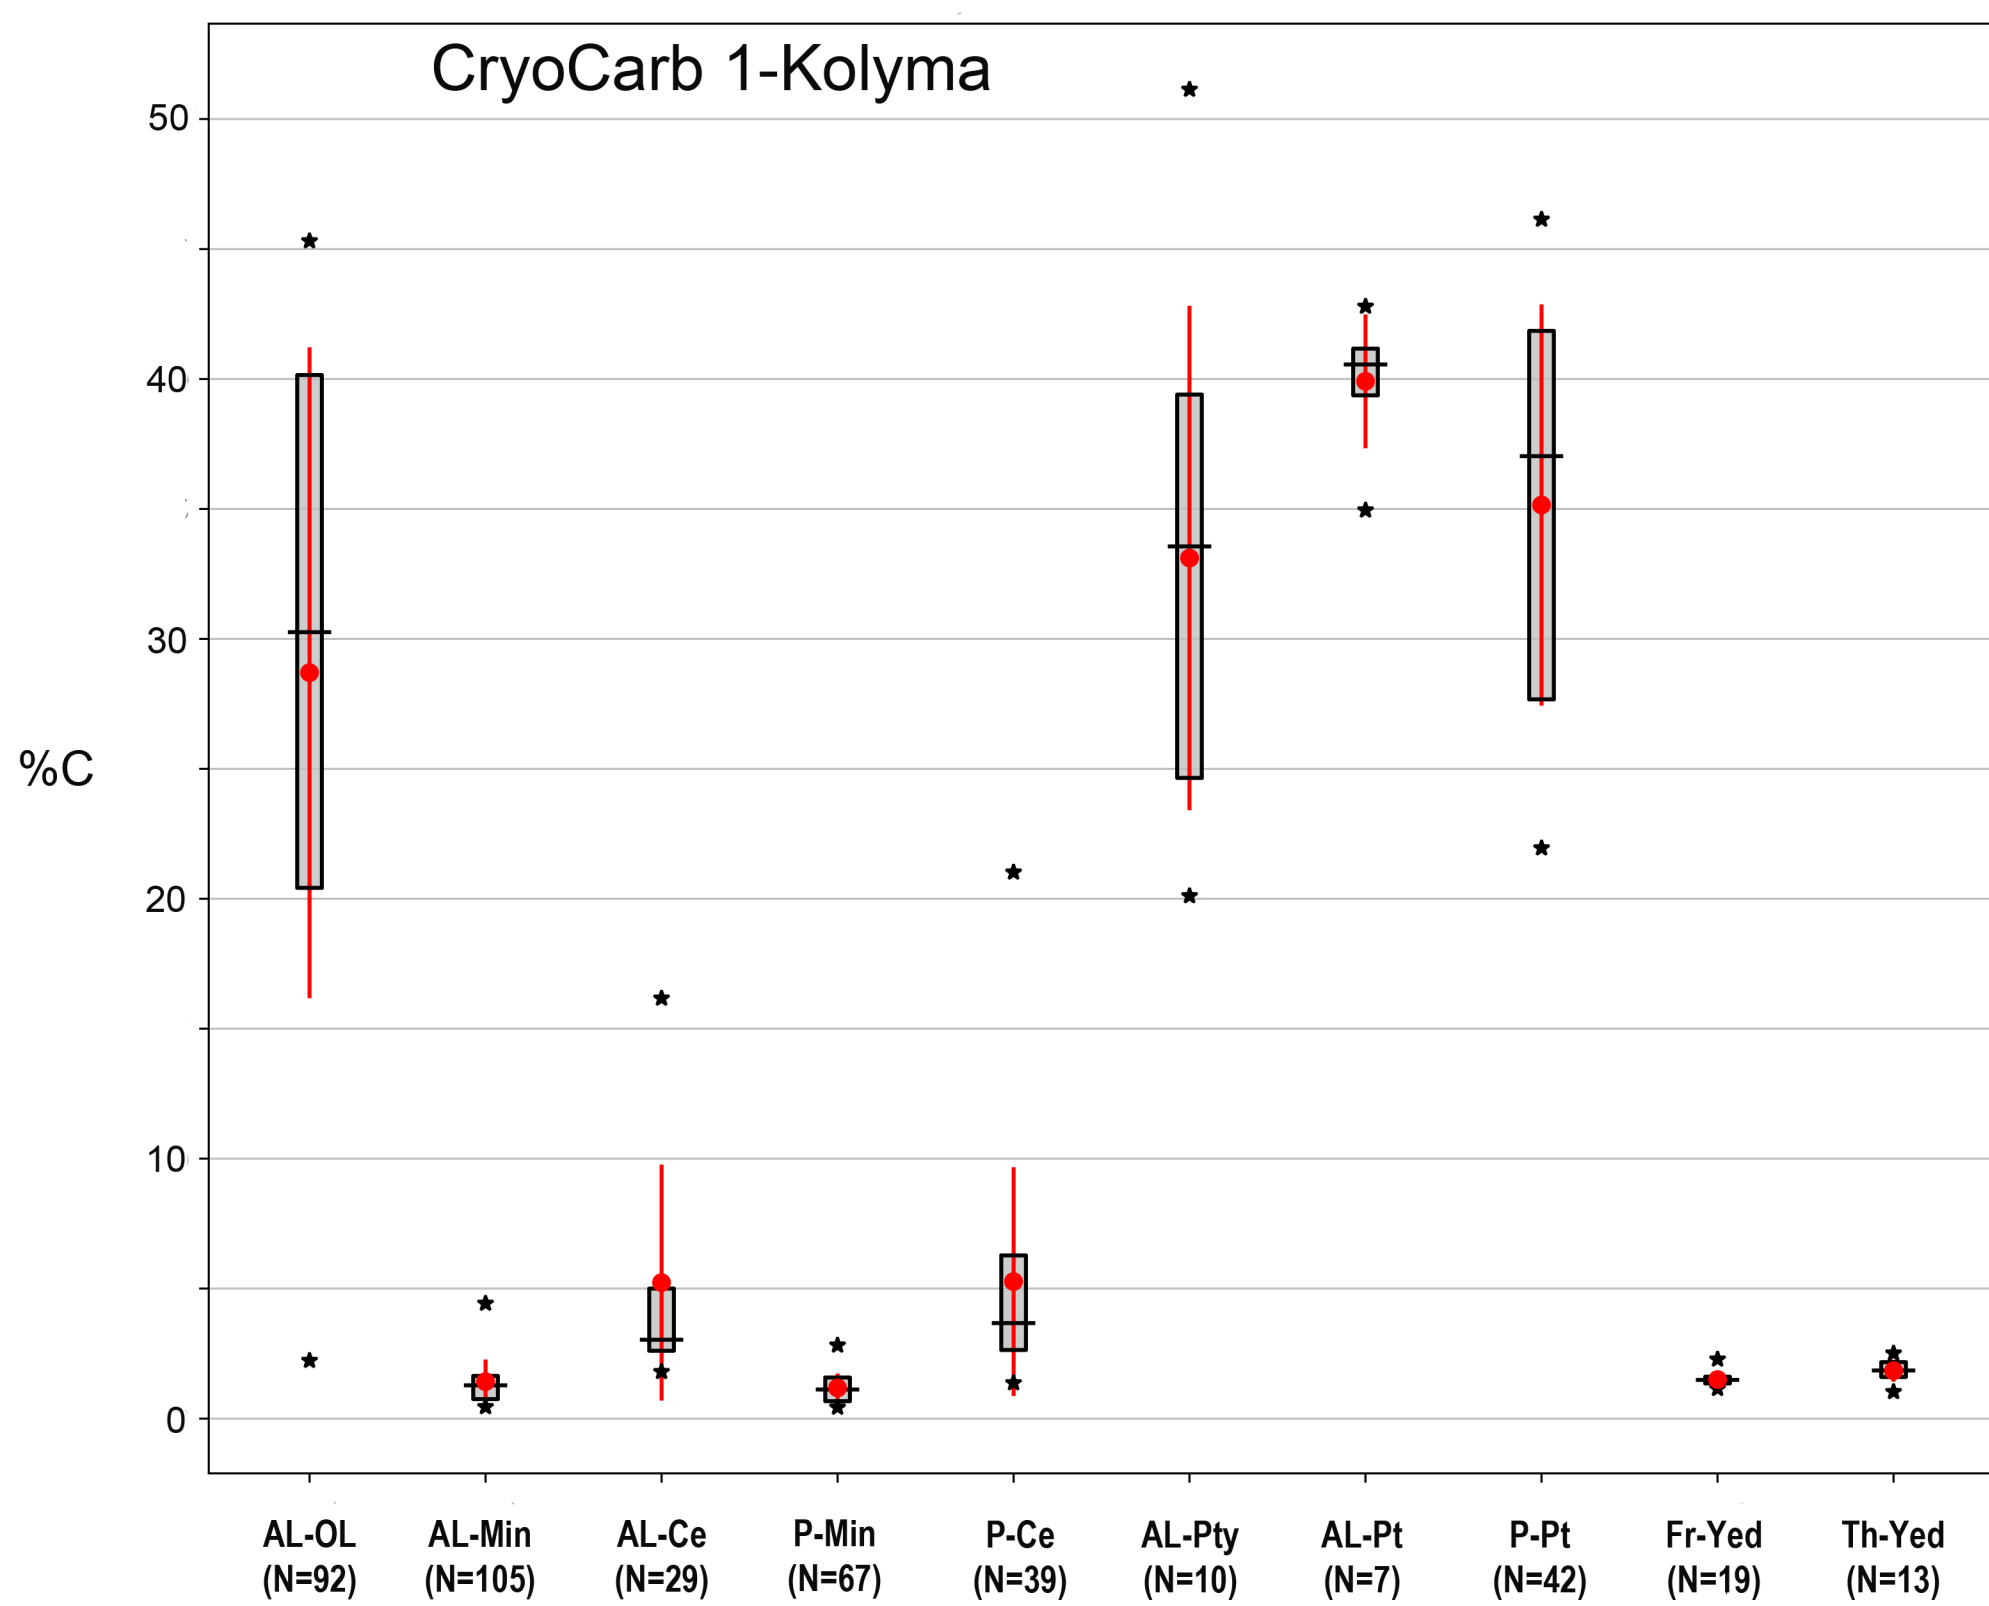

Supplement: Supplementary file 1 [file bg-2019-89-supplement.pdf]
